# Supplementary material for: Nodakenin Ameliorates Ovariectomy-Induced Bone Loss by Regulating Gut Microbiota
Source: MDPI journal article supplement (doi:10.3390/molecules29061240), 2024-03-11
Supplement: s1 [file s1]

Table S1. Primer sequence for RT-PCR.

| Gene         | Primer sequence                                                                |
|--------------|--------------------------------------------------------------------------------|
| Occludin     | Forward: 5'- ATGTCCGGCCGATGCTCTC-3'<br>Reverse: 5'-TTTGGCTGCTCTTGGGTCTGTAT-3'  |
| ZO-1         | Forward: 5'-GCCGCTAAGAGCACAGCAA -3'<br>Reverse: 5'-GCCCTCCTTTTAACACATCAGA- 3'  |
| TNF $\alpha$ | Forward: 5'- CAGGCGGTGCCTATGTCTC-3'<br>Reverse: 5'-CGATCACCCCGAAGTTCAGTAG-3'   |
| IL-1 $\beta$ | Forward: 5'- GAAATGCCACCTTTTGACAGTG-3'<br>Reverse: 5'-TGGATGCTCTCATCAGGACAG-3' |
| GAPDH        | Forward: 5'- AGGTCGGTGTGAACGGATTTG-3'<br>Reverse: 5'-GGGGTCGTTGATGGCAACA-3'    |
| VDR          | Forward: 5'- GAATGTGCCTCGGATCTGTGG-3'<br>Reverse: 5'-ATGCGGCAATCTCCATTGAAG-3'  |
| Alp          | Forward: 5'- CCAACTCTTTTGTGCCAGAGA-3'<br>Reverse: 5'-GGCTACATTGGTGTGAGCTTTT-3' |
| Col-I        | Forward: 5'- TAAGGGTCCCAATGGTGAGA-3'<br>Reverse: 5'-GGGTCCCTCGACTCCTACAT-3'    |
| OCN          | Forward: 5'- CTGACCTCACAGATCCCAAGC-3'<br>Reverse: 5'-TGGTCTGATAGCTCGTCACAAG-3' |
