# Supplementary figures and images for: Nodakenin Ameliorates Ovariectomy-Induced Bone Loss by Regulating Gut Microbiota
Source: MDPI journal article supplement (doi:10.3390/molecules29061240), 2024-03-11

## Rarefaction Curves

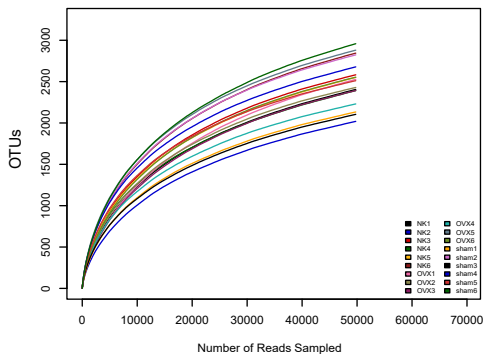

**B**

### Shannon–Wiener Curves

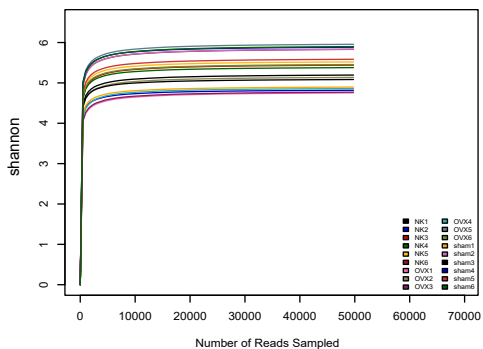

Supplement: s1 [file s1]

**A**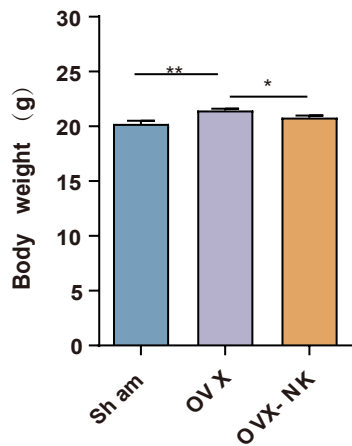**B**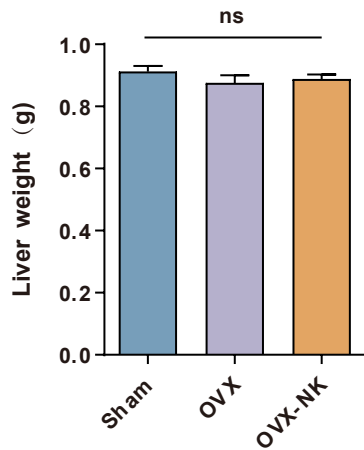**C**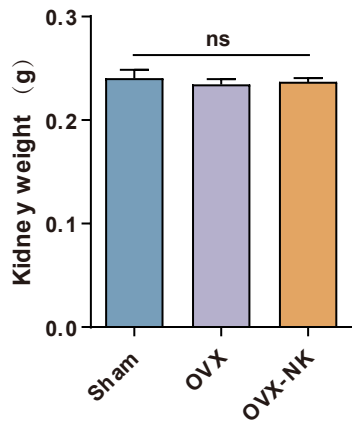**D**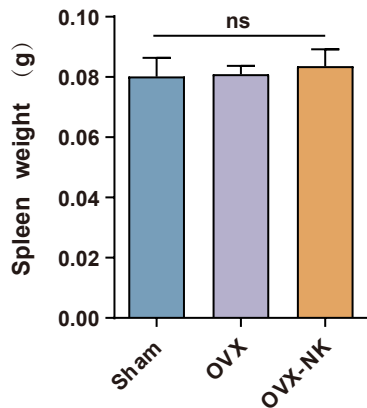

Supplement: s1 [file s1]
